# Supplementary material for: Design and high-throughput synthesis of cyclodextrin-based polyurethanes with enhanced molecular recognition properties
Source: Royal Society of Chemistry journal article supplement (doi:10.1039/c2py20764h), 2012-10-18
Supplement: c2py20764h.pdf [file c2py20764h.pdf]

Electronic Supplementary Information

**Design and high-throughput synthesis of cyclodextrin-based  
polyurethanes with enhanced molecular recognition  
properties**

Pu Xiao,<sup>a</sup> Philippe Corvini,<sup>a,b</sup> Yves Dudal<sup>c</sup> and Patrick Shahgaldian<sup>a\*</sup>

a) Institute of Chemistry and Bioanalytics, School of Life Sciences, University of Applied Sciences and Arts Northwestern Switzerland. Gründenstrasse 40, CH-4132 Muttenz, Switzerland; E-mail: patrick.shahgaldian@fhnw.ch, pu.xiao@fhnw.ch;

b) School of the Environment, Nanjing University, Nanjing, 210093, P R China;

c) INOFEA GmbH, Hochbergerstrasse 60c, CH-4057 Basel, Switzerland.

Table 1s Compositions for the high-throughput synthesized CDPs; values are given in  $\mu\text{mol}$

| CDPs    | $\alpha$ -CD | $\beta$ -CD | $\gamma$ -CD | DMPA | DHBA | DHTA | DHNA | PDI  | TDI  | IPDI | HDI  |
|---------|--------------|-------------|--------------|------|------|------|------|------|------|------|------|
| CDP51   | 8.2          | —           | —            | —    | —    | —    | —    | 24.6 | —    | —    | —    |
| CDP52   | 8.2          | —           | —            | —    | —    | —    | —    | —    | 24.6 | —    | —    |
| CDP53   | 8.2          | —           | —            | —    | —    | —    | —    | —    | —    | 24.6 | —    |
| CDP54   | 8.2          | —           | —            | —    | —    | —    | —    | —    | —    | —    | 24.6 |
| CDP55   | 8.2          | —           | —            | 4.1  | —    | —    | —    | 28.7 | —    | —    | —    |
| CDP56   | 8.2          | —           | —            | —    | 4.1  | —    | —    | 28.7 | —    | —    | —    |
| CDP57   | 8.2          | —           | —            | —    | —    | 4.1  | —    | 28.7 | —    | —    | —    |
| CDP58   | 8.2          | —           | —            | —    | —    | —    | 4.1  | 28.7 | —    | —    | —    |
| CDP59*  | 8.2          | —           | —            | 4.1  | —    | —    | —    | —    | 28.7 | —    | —    |
| CDP60   | 8.2          | —           | —            | —    | 4.1  | —    | —    | —    | 28.7 | —    | —    |
| CDP61   | 8.2          | —           | —            | —    | —    | 4.1  | —    | —    | 28.7 | —    | —    |
| CDP62   | 8.2          | —           | —            | —    | —    | —    | 4.1  | —    | 28.7 | —    | —    |
| CDP63*  | 8.2          | —           | —            | 4.1  | —    | —    | —    | —    | —    | 28.7 | —    |
| CDP64*  | 8.2          | —           | —            | —    | 4.1  | —    | —    | —    | —    | 28.7 | —    |
| CDP65*  | 8.2          | —           | —            | —    | —    | 4.1  | —    | —    | —    | 28.7 | —    |
| CDP66*  | 8.2          | —           | —            | —    | —    | —    | 4.1  | —    | —    | 28.7 | —    |
| CDP67   | 8.2          | —           | —            | 4.1  | —    | —    | —    | —    | —    | —    | 28.7 |
| CDP68   | 8.2          | —           | —            | —    | 4.1  | —    | —    | —    | —    | —    | 28.7 |
| CDP69   | 8.2          | —           | —            | —    | —    | 4.1  | —    | —    | —    | —    | 28.7 |
| CDP70   | 8.2          | —           | —            | —    | —    | —    | 4.1  | —    | —    | —    | 28.7 |
| CDP71   | —            | 7.0         | —            | —    | —    | —    | —    | 24.5 | —    | —    | —    |
| CDP72   | —            | 7.0         | —            | —    | —    | —    | —    | —    | 24.5 | —    | —    |
| CDP73   | —            | 7.0         | —            | —    | —    | —    | —    | —    | —    | 24.5 | —    |
| CDP74   | —            | 7.0         | —            | —    | —    | —    | —    | —    | —    | —    | 24.5 |
| CDP75   | —            | 7.0         | —            | 3.5  | —    | —    | —    | 28.0 | —    | —    | —    |
| CDP76   | —            | 7.0         | —            | —    | 3.5  | —    | —    | 28.0 | —    | —    | —    |
| CDP77   | —            | 7.0         | —            | —    | —    | 3.5  | —    | 28.0 | —    | —    | —    |
| CDP78   | —            | 7.0         | —            | —    | —    | —    | 3.5  | 28.0 | —    | —    | —    |
| CDP79   | —            | 7.0         | —            | 3.5  | —    | —    | —    | —    | 28.0 | —    | —    |
| CDP80   | —            | 7.0         | —            | —    | 3.5  | —    | —    | —    | 28.0 | —    | —    |
| CDP81   | —            | 7.0         | —            | —    | —    | 3.5  | —    | —    | 28.0 | —    | —    |
| CDP82   | —            | 7.0         | —            | —    | —    | —    | 3.5  | —    | 28.0 | —    | —    |
| CDP83   | —            | 7.0         | —            | 3.5  | —    | —    | —    | —    | —    | 28.0 | —    |
| CDP84*  | —            | 7.0         | —            | —    | 3.5  | —    | —    | —    | —    | 28.0 | —    |
| CDP85*  | —            | 7.0         | —            | —    | —    | 3.5  | —    | —    | —    | 28.0 | —    |
| CDP86*  | —            | 7.0         | —            | —    | —    | —    | 3.5  | —    | —    | 28.0 | —    |
| CDP87   | —            | 7.0         | —            | 3.5  | —    | —    | —    | —    | —    | —    | 28.0 |
| CDP88   | —            | 7.0         | —            | —    | 3.5  | —    | —    | —    | —    | —    | 28.0 |
| CDP89   | —            | 7.0         | —            | —    | —    | 3.5  | —    | —    | —    | —    | 28.0 |
| CDP90   | —            | 7.0         | —            | —    | —    | —    | 3.5  | —    | —    | —    | 28.0 |
| CDP91   | —            | —           | 6.2          | —    | —    | —    | —    | 24.8 | —    | —    | —    |
| CDP92   | —            | —           | 6.2          | —    | —    | —    | —    | —    | 24.8 | —    | —    |
| CDP93   | —            | —           | 6.2          | —    | —    | —    | —    | —    | —    | 24.8 | —    |
| CDP94   | —            | —           | 6.2          | —    | —    | —    | —    | —    | —    | —    | 24.8 |
| CDP95   | —            | —           | 6.2          | 3.1  | —    | —    | —    | 27.9 | —    | —    | —    |
| CDP96   | —            | —           | 6.2          | —    | 3.1  | —    | —    | 27.9 | —    | —    | —    |
| CDP97   | —            | —           | 6.2          | —    | —    | 3.1  | —    | 27.9 | —    | —    | —    |
| CDP98   | —            | —           | 6.2          | —    | —    | —    | 3.1  | 27.9 | —    | —    | —    |
| CDP99   | —            | —           | 6.2          | 3.1  | —    | —    | —    | —    | 27.9 | —    | —    |
| CDP100  | —            | —           | 6.2          | —    | 3.1  | —    | —    | —    | 27.9 | —    | —    |
| CDP101  | —            | —           | 6.2          | —    | —    | 3.1  | —    | —    | 27.9 | —    | —    |
| CDP102  | —            | —           | 6.2          | —    | —    | —    | 3.1  | —    | 27.9 | —    | —    |
| CDP103  | —            | —           | 6.2          | 3.1  | —    | —    | —    | —    | —    | 27.9 | —    |
| CDP104  | —            | —           | 6.2          | —    | 3.1  | —    | —    | —    | —    | 27.9 | —    |
| CDP105* | —            | —           | 6.2          | —    | —    | 3.1  | —    | —    | —    | 27.9 | —    |
| CDP106  | —            | —           | 6.2          | —    | —    | —    | 3.1  | —    | —    | 27.9 | —    |
| CDP107  | —            | —           | 6.2          | 3.1  | —    | —    | —    | —    | —    | —    | 27.9 |
| CDP108  | —            | —           | 6.2          | —    | 3.1  | —    | —    | —    | —    | —    | 27.9 |
| CDP109  | —            | —           | 6.2          | —    | —    | 3.1  | —    | —    | —    | —    | 27.9 |
| CDP110  | —            | —           | 6.2          | —    | —    | —    | 3.1  | —    | —    | —    | 27.9 |

\* Marked CDPs: no polymer was obtained after washing steps.

Table 2s Normalized binding percentage (%) of the studied compounds onto the high-throughput synthesized CDPs in the mixed aqueous solution (compound solution: 0.1 mmol L<sup>-1</sup>, 1 mL; contact time: 2h).

| CDPs   | APAP       | ATE        | CAF        | OFX        | CFX        | TC         | SMX        | CHPH       | PRO        | DF         |
|--------|------------|------------|------------|------------|------------|------------|------------|------------|------------|------------|
| CDP51  | 6.8 ± 1.0  | 2.0 ± 0.3  | 16.8 ± 2.1 | 12.3 ± 0.6 | 15.2 ± 0.8 | 3.7 ± 1.4  | 12.3 ± 1.1 | 9.4 ± 0.4  | 6.4 ± 0.6  | 22.7 ± 0.3 |
| CDP52  | 5.6 ± 1.0  | 6.0 ± 1.1  | 8.8 ± 0.9  | 13.4 ± 0.7 | 14.5 ± 0.6 | 9.3 ± 0.4  | 8.5 ± 0.6  | 7.2 ± 0.1  | 12.7 ± 0.8 | 20.8 ± 0.2 |
| CDP53  | 16.4 ± 0.1 | 1.8 ± 0.4  | 4.6 ± 1.2  | 2.3 ± 1.3  | 1.9 ± 1.5  | 0          | 23.6 ± 1.4 | 13.1 ± 0.3 | 15.9 ± 1.4 | 24.1 ± 2.1 |
| CDP54  | 7.4 ± 1.1  | 0.5 ± 0.7  | 2.8 ± 0.9  | 3.3 ± 1.4  | 6.3 ± 1.6  | 0          | 23.6 ± 1.0 | 16.3 ± 1.2 | 17.4 ± 1.3 | 29.2 ± 2.5 |
| CDP55  | 5.0 ± 0.8  | 7.7 ± 0.5  | 8.0 ± 1.0  | 14.2 ± 1.8 | 15.2 ± 2.1 | 7.8 ± 0.4  | 7.3 ± 0.6  | 6.3 ± 0.8  | 16.6 ± 0.3 | 15.6 ± 1.5 |
| CDP56  | 5.8 ± 1.0  | 6.1 ± 0.7  | 9.2 ± 0.7  | 13.0 ± 0.8 | 13.8 ± 0.8 | 9.1 ± 0.3  | 8.9 ± 0.3  | 7.8 ± 0.6  | 12.5 ± 0.4 | 17.9 ± 1.3 |
| CDP57  | 5.6 ± 1.0  | 6.0 ± 1.1  | 8.8 ± 0.9  | 13.4 ± 0.7 | 14.5 ± 0.6 | 9.3 ± 0.4  | 8.5 ± 0.6  | 7.2 ± 0.1  | 12.7 ± 0.8 | 20.8 ± 0.2 |
| CDP58  | 6.2 ± 0.4  | 7.0 ± 0.2  | 9.5 ± 0.1  | 12.0 ± 0.5 | 13.4 ± 0.2 | 9.9 ± 0.2  | 9.3 ± 0.2  | 7.8 ± 0.0  | 12.7 ± 0.3 | 15.5 ± 1.2 |
| CDP60  | 8.4 ± 0.8  | 6.9 ± 0.3  | 9.3 ± 0.9  | 10.6 ± 0.4 | 12.4 ± 0.3 | 5.7 ± 0.1  | 9.8 ± 0.4  | 8.6 ± 0.9  | 15.2 ± 1.0 | 16.9 ± 0.9 |
| CDP61  | 9.6 ± 0.6  | 3.8 ± 0.8  | 10.2 ± 0.1 | 9.0 ± 0.4  | 10.3 ± 0.8 | 4.7 ± 0.5  | 12.1 ± 0.2 | 8.2 ± 0.2  | 13.9 ± 0.1 | 23.6 ± 1.4 |
| CDP62  | 9.3 ± 1.5  | 5.9 ± 1.4  | 8.8 ± 0.4  | 10.6 ± 0.5 | 12.9 ± 0.8 | 6.3 ± 2.0  | 10.0 ± 0.1 | 6.6 ± 1.0  | 14.8 ± 1.5 | 19.4 ± 2.8 |
| CDP67  | 2.2 ± 0.8  | 5.6 ± 0.7  | 2.7 ± 1.0  | 11.8 ± 0.3 | 19.1 ± 0.2 | 4.7 ± 0.5  | 8.2 ± 0.6  | 5.0 ± 0.6  | 26.3 ± 0.3 | 18.8 ± 1.6 |
| CDP68  | 1.8 ± 0.5  | 0.6 ± 0.6  | 1.3 ± 0.4  | 10.0 ± 1.3 | 19.1 ± 1.6 | 4.3 ± 0.8  | 7.5 ± 2.6  | 4.9 ± 1.2  | 18.5 ± 2.6 | 41.4 ± 1.3 |
| CDP69  | 0.6 ± 0.7  | 0.3 ± 0.4  | 0          | 10.0 ± 0.6 | 23.1 ± 0.6 | 3.5 ± 0.7  | 4.3 ± 0.6  | 1.6 ± 0.7  | 22.0 ± 1.4 | 45.0 ± 0.4 |
| CDP70  | 2.3 ± 0.5  | 1.8 ± 0.5  | 1.4 ± 0.4  | 9.9 ± 1.5  | 18.5 ± 1.0 | 6.6 ± 1.0  | 8.6 ± 0.4  | 7.0 ± 0.1  | 18.1 ± 1.1 | 33.5 ± 2.0 |
| CDP71  | 7.1 ± 1.2  | 0.9 ± 0.8  | 14.1 ± 0.8 | 9.9 ± 0.3  | 11.6 ± 0.3 | 9.2 ± 0.5  | 12.4 ± 0.3 | 9.9 ± 0.2  | 3.9 ± 0.6  | 21.0 ± 1.0 |
| CDP72  | 14.3 ± 2.7 | 2.6 ± 0.9  | 14.1 ± 2.2 | 6.2 ± 1.6  | 8.0 ± 1.5  | 4.4 ± 2.4  | 14.1 ± 1.1 | 9.8 ± 1.9  | 6.6 ± 0.4  | 19.8 ± 1.9 |
| CDP73  | 10.6 ± 3.3 | 2.7 ± 3.1  | 7.3 ± 0.6  | 4.8 ± 0.8  | 6.6 ± 0.2  | 5.5 ± 1.4  | 14.3 ± 0.6 | 9.4 ± 1.5  | 9.7 ± 0.9  | 29.2 ± 2.3 |
| CDP74  | 16.5 ± 0.7 | 2.6 ± 2.1  | 3.4 ± 0.5  | 3.2 ± 1.5  | 2.5 ± 2.8  | 0.6 ± 1.1  | 19.4 ± 2.7 | 10.7 ± 2.1 | 12.5 ± 0.8 | 28.6 ± 6.2 |
| CDP75  | 4.7 ± 0.0  | 7.1 ± 0.3  | 7.2 ± 0.1  | 14.0 ± 0.2 | 16.3 ± 0.2 | 8.9 ± 0.7  | 7.0 ± 0.0  | 6.6 ± 0.3  | 14.3 ± 0.2 | 13.9 ± 0.6 |
| CDP76  | 3.6 ± 0.7  | 3.3 ± 0.5  | 8.5 ± 0.7  | 13.9 ± 0.5 | 17.4 ± 1.0 | 6.2 ± 1.0  | 8.7 ± 0.3  | 5.8 ± 0.7  | 13.0 ± 0.4 | 19.4 ± 1.9 |
| CDP77  | 4.3 ± 0.8  | 4.2 ± 0.6  | 7.4 ± 0.7  | 13.0 ± 0.2 | 15.1 ± 0.4 | 7.2 ± 0.3  | 10.3 ± 0.4 | 7.4 ± 0.1  | 11.7 ± 0.2 | 19.2 ± 1.6 |
| CDP78  | 4.0 ± 0.2  | 3.7 ± 0.5  | 9.0 ± 0.5  | 12.7 ± 0.2 | 14.8 ± 0.5 | 8.8 ± 0.2  | 9.5 ± 0.3  | 7.7 ± 0.2  | 12.6 ± 0.2 | 17.1 ± 0.6 |
| CDP79  | 10.0 ± 1.4 | 10.0 ± 2.0 | 8.9 ± 2.6  | 9.8 ± 3.9  | 14.5 ± 2.0 | 0.2 ± 0.4  | 10.2 ± 0.7 | 4.2 ± 1.8  | 19.6 ± 2.1 | 12.6 ± 1.5 |
| CDP80  | 8.6 ± 0.3  | 5.9 ± 0.4  | 7.0 ± 0.4  | 10.4 ± 0.1 | 12.3 ± 0.5 | 3.8 ± 0.8  | 12.3 ± 0.3 | 9.9 ± 1.7  | 12.9 ± 0.3 | 16.9 ± 2.5 |
| CDP81  | 7.7 ± 0.4  | 3.1 ± 0.2  | 7.9 ± 0.6  | 7.5 ± 0.2  | 9.5 ± 0.7  | 3.2 ± 0.5  | 15.6 ± 0.2 | 9.6 ± 0.9  | 11.3 ± 0.4 | 24.3 ± 1.0 |
| CDP82  | 11.0 ± 2.3 | 5.2 ± 0.6  | 8.8 ± 0.7  | 7.9 ± 1.4  | 10.4 ± 1.6 | 2.6 ± 0.6  | 13.4 ± 0.4 | 9.0 ± 2.3  | 12.5 ± 1.2 | 19.0 ± 1.7 |
| CDP83  | 2.0 ± 2.2  | 0.6 ± 1.0  | 0          | 8.0 ± 1.0  | 13.9 ± 9.9 | 0          | 10.9 ± 2.7 | 2.8 ± 2.7  | 34.2 ± 5.7 | 27.7 ± 7.5 |
| CDP87  | 2.6 ± 0.9  | 6.5 ± 2.0  | 0.6 ± 0.5  | 11.2 ± 1.0 | 20.0 ± 0.5 | 2.6 ± 2.9  | 6.6 ± 1.8  | 2.2 ± 0.5  | 30.7 ± 3.0 | 17.0 ± 3.1 |
| CDP88  | 4.7 ± 1.7  | 0.3 ± 0.3  | 1.1 ± 0.2  | 4.5 ± 0.1  | 11.3 ± 1.6 | 0.4 ± 0.4  | 14.5 ± 1.6 | 4.5 ± 0.6  | 18.2 ± 1.1 | 40.6 ± 2.4 |
| CDP89  | 0          | 0          | 0          | 5.4 ± 0.6  | 16.0 ± 0.5 | 0          | 6.5 ± 1.4  | 1.2 ± 2.0  | 13.1 ± 0.5 | 57.8 ± 2.8 |
| CDP90  | 5.1 ± 0.7  | 1.4 ± 0.1  | 0          | 5.3 ± 0.2  | 13.3 ± 0.7 | 5.8 ± 0.3  | 13.6 ± 0.6 | 8.6 ± 0.5  | 15.8 ± 0.5 | 31.1 ± 1.2 |
| CDP91  | 5.1 ± 0.4  | 0.8 ± 0.4  | 16.1 ± 0.5 | 10.9 ± 0.2 | 12.4 ± 0.2 | 5.7 ± 0.5  | 11.3 ± 0.1 | 6.4 ± 0.3  | 4.5 ± 0.2  | 26.7 ± 0.2 |
| CDP92  | 8.3 ± 1.6  | 0.8 ± 0.4  | 17.0 ± 1.2 | 7.1 ± 1.0  | 8.8 ± 1.0  | 2.5 ± 1.3  | 14.7 ± 0.8 | 7.7 ± 0.1  | 6.4 ± 0.3  | 26.5 ± 1.0 |
| CDP93  | 10.1 ± 1.1 | 0.5 ± 0.4  | 5.0 ± 1.0  | 3.1 ± 0.6  | 4.1 ± 0.7  | 0.1 ± 0.5  | 19.2 ± 0.7 | 9.6 ± 0.5  | 11.4 ± 0.7 | 36.8 ± 2.8 |
| CDP94  | 10.1 ± 1.9 | 2.9 ± 0.8  | 3.8 ± 1.0  | 3.5 ± 0.6  | 4.6 ± 0.9  | 0          | 20.9 ± 0.2 | 6.8 ± 0.9  | 16.1 ± 1.4 | 31.8 ± 2.8 |
| CDP95  | 4.2 ± 0.1  | 5.2 ± 0.4  | 7.7 ± 0.1  | 14.3 ± 0.2 | 15.4 ± 0.1 | 8.2 ± 0.3  | 7.9 ± 0.0  | 6.7 ± 0.1  | 13.6 ± 0.1 | 16.8 ± 0.7 |
| CDP96  | 4.4 ± 0.2  | 3.9 ± 0.3  | 8.4 ± 0.3  | 13.1 ± 0.2 | 14.6 ± 0.1 | 7.7 ± 0.1  | 8.7 ± 0.1  | 7.1 ± 0.0  | 12.2 ± 0.2 | 19.9 ± 0.4 |
| CDP97  | 4.4 ± 0.2  | 3.0 ± 0.4  | 8.0 ± 0.2  | 13.4 ± 0.1 | 15.0 ± 0.4 | 8.7 ± 0.4  | 8.2 ± 0.1  | 7.2 ± 0.3  | 11.2 ± 0.1 | 20.8 ± 1.2 |
| CDP98  | 5.1 ± 0.3  | 4.0 ± 0.3  | 9.8 ± 0.1  | 11.9 ± 0.2 | 13.7 ± 0.1 | 8.1 ± 0.5  | 9.3 ± 0.0  | 8.1 ± 0.1  | 12.2 ± 0.1 | 17.6 ± 0.8 |
| CDP99  | 4.4 ± 0.9  | 6.1 ± 0.3  | 4.9 ± 0.4  | 12.9 ± 1.4 | 17.8 ± 0.7 | 2.6 ± 1.8  | 8.7 ± 0.7  | 5.0 ± 1.2  | 23.5 ± 5.8 | 13.9 ± 2.0 |
| CDP100 | 8.0 ± 2.2  | 3.7 ± 0.4  | 10.4 ± 1.7 | 5.6 ± 2.9  | 10.4 ± 1.8 | 4.4 ± 1.1  | 12.4 ± 1.0 | 8.1 ± 0.2  | 12.8 ± 1.5 | 24.1 ± 2.1 |
| CDP101 | 8.6 ± 1.0  | 0.5 ± 0.8  | 9.1 ± 0.4  | 3.3 ± 0.5  | 6.5 ± 0.5  | 1.1 ± 0.6  | 13.9 ± 1.5 | 5.6 ± 1.0  | 14.3 ± 1.0 | 37.0 ± 2.4 |
| CDP102 | 6.9 ± 0.7  | 4.1 ± 1.1  | 7.9 ± 0.5  | 9.8 ± 0.4  | 12.1 ± 1.1 | 5.2 ± 0.8  | 9.9 ± 0.6  | 6.8 ± 0.5  | 14.8 ± 0.5 | 22.4 ± 0.9 |
| CDP103 | 11.9 ± 0.5 | 5.3 ± 1.6  | 7.1 ± 5.0  | 4.5 ± 4.2  | 8.2 ± 3.4  | 0.2 ± 0.4  | 14.5 ± 1.7 | 8.0 ± 2.2  | 20.0 ± 2.1 | 20.4 ± 2.1 |
| CDP104 | 3.9 ± 1.6  | 0          | 0          | 1.1 ± 1.0  | 6.3 ± 1.8  | 0.4 ± 0.7  | 17.1 ± 2.5 | 5.8 ± 0.9  | 12.9 ± 0.7 | 52.4 ± 3.2 |
| CDP106 | 8.8 ± 2.4  | 0          | 1.3 ± 1.0  | 2.4 ± 2.4  | 11.9 ± 3.4 | 15.1 ± 0.7 | 15.4 ± 3.2 | 8.0 ± 3.4  | 6.6 ± 1.7  | 30.4 ± 3.7 |
| CDP107 | 4.1 ± 0.2  | 7.4 ± 0.7  | 2.3 ± 0.2  | 10.4 ± 0.7 | 15.2 ± 0.6 | 4.9 ± 0.3  | 10.0 ± 0.3 | 5.5 ± 0.2  | 22.4 ± 0.8 | 17.8 ± 0.8 |
| CDP108 | 1.4 ± 0.8  | 0.1 ± 0.2  | 0.2 ± 0.3  | 4.5 ± 0.7  | 11.1 ± 1.0 | 4.3 ± 0.4  | 11.0 ± 0.6 | 5.2 ± 0.5  | 18.1 ± 0.5 | 44.1 ± 0.9 |
| CDP109 | 0.8 ± 0.3  | 0.1 ± 0.2  | 0.1 ± 0.2  | 6.0 ± 0.6  | 14.4 ± 0.4 | 4.8 ± 0.4  | 6.0 ± 0.4  | 3.8 ± 0.1  | 14.8 ± 0.1 | 49.1 ± 1.4 |
| CDP110 | 2.2 ± 0.7  | 0.4 ± 0.2  | 0.9 ± 0.3  | 6.2 ± 0.3  | 14.4 ± 0.7 | 7.6 ± 0.4  | 10.1 ± 0.1 | 6.8 ± 0.1  | 15.7 ± 0.6 | 35.6 ± 1.4 |
